# Supplementary material for: Mediator is an intrinsic component of the basal RNA polymerase II machinery in vivo
Source: PubMed Central journal article supplement (PMC3834807; doi:10.1093/nar/gkt701), 2013-08-20
Supplement: supp_gkt701_nar-00448-r-2013-File009.pdf [file supp_gkt701_nar-00448-r-2013-File009.pdf]

## Supplementary material

### Mediator is an intrinsic component of the basal RNA polymerase II machinery *in vivo*

Thierry Lacombe, Siew Lay Poh, Régine Barbey , and Laurent Kuras.

Table S1. *Saccharomyces cerevisiae* strains.

| Strain | Relevant genotype                                                                                              | Source                    |
|--------|----------------------------------------------------------------------------------------------------------------|---------------------------|
| Y14    | <i>MATa ade2 ura3 his3 leu2 trp1 SPT15::3HA-SPT15</i>                                                          | Kuras&Struhl (1999)       |
| Y84    | <i>MATa ade2 ura3 his3 leu2 trp1 RGR1::RGR1-TAP-KITRP1 SPT15::3HA-SPT15</i>                                    | Kuras <i>et al</i> (2003) |
| Y400   | <i>MATa ade2 ura3 his3 leu2 trp1 srb4::His3MX6 [RY2844 (SRB4, LEU2, CEM)]</i>                                  | This study                |
| Y402   | <i>MATa ade2 ura3 his3 leu2 trp1 srb4::His3MX6 [RY2882 (srb4-138, LEU2, CEM)]</i>                              | This study                |
| Y805   | <i>MATa ade2 ura3 his3 leu2 trp1 SUA7::KanMX6-PGAL1-SUA7</i>                                                   | This study                |
| Y807   | <i>MATa ade2 ura3 his3 leu2 trp1 med2Δ::His3MX6 SUA7::KanMX6-PGAL1-SUA7</i>                                    | This study                |
| Y809   | <i>MATa ade2 ura3 his3 leu2 trp1 med3Δ::His3MX6 SUA7::KanMX6-PGAL1-SUA7</i>                                    | This study                |
| Y811   | <i>MATa ade2 ura3 his3 leu2 trp1 lys2 rgr1-100 SUA7::KanMX6-PGAL1-SUA7</i>                                     | This study                |
| Y822   | <i>MATa ade2 ura3 his3 leu2 trp1 srb4::His3MX6 SUA7::KanMX6-PGAL1-SUA7 [RY2844 (SRB4, LEU2, CEM)]</i>          | This study                |
| Y823   | <i>MATa ade2 ura3 his3 leu2 trp1 srb4::His3MX6 SUA7::KanMX6-PGAL1-SUA7 [RY2882 (srb4-138, LEU2, CEM)]</i>      | This study                |
| Y892   | <i>MATa ade2 ura3 his3 leu2 trp1 SPT15::3HA-SPT15 SUA7::KanMX6-PGAL1-SUA7</i>                                  | This study                |
| Y893   | <i>MATa ade2 ura3 his3 leu2 trp1 NUT1::NUT1-TAP-KITRP1 SPT15::3HA-SPT15 SUA7::KanMX6-P<sub>GAL1</sub>-SUA7</i> | This study                |
| Y894   | <i>MATa ade2 ura3 his3 leu2 trp1 RGR1::RGR1-TAP-KITRP1 SPT15::3HA-SPT15 SUA7::KanMX6-PGAL1-SUA7</i>            | This study                |
| Y909   | <i>MATa ade2 ura3 his3 leu2 trp1 RPB1 RGR1::RGR1-TAP-KITRP1 SUA7::KanMX6-PGAL1-SUA7</i>                        | This study                |
| Y911   | <i>MATa ade2 ura3 his3 leu2 trp1 rpb1-1 RGR1::RGR1-TAP-KITRP1 SUA7::KanMX6-PGAL1-SUA7</i>                      | This study                |
| Y959   | <i>MAT<sub>α</sub> ura3 his3 leu2 trp1 SUA7::kanMX6-PGAL1-SUA7</i>                                             | This study                |
| Y960   | <i>MAT<sub>α</sub> ura3 his3 leu2 trp1 kin28-ts3 SUA7::kanMX6-PGAL1-SUA7</i>                                   | This study                |
| Y963   | <i>MATa ade2 ura3 his3 leu2 trp1 met4Δ::TRP1 RGR1::RGR1-TAP-KITRP1 SUA7::KanMX6-PGAL1-SUA7</i>                 | This study                |

Table S2. Sequence of primers used in RT-qPCR and ChIP experiments

| Gene                 |     | position | Sequence 5'->3'               |
|----------------------|-----|----------|-------------------------------|
| 25s rDNA             | Fwd | +624     | GGTTATATGCCGCCCGTCTTGA        |
|                      | Rev | +800     | CCCAACAGCTATGCTCTTACTC        |
| <i>ACT1</i> ORF      | Fwd | +306     | ATTATATGTTTAGAGGTTGCTGCTTTGG  |
|                      | Rev | +590     | CAATTCGTTGTAGAAGGTATGATGCC    |
| 5' <i>GFP</i> ORF    | Fwd | +26      | CTGGTGTGTCCCAATTTTGGTTG       |
|                      | Rev | +215     | GCAAAACATTGAACACCATAACCGA     |
| 3' <i>GFP</i> ORF    | Fwd | +520     | GGTTCTGTTCAATTAGCTGACCATT     |
|                      | Rev | +704     | TCATCCATACCATGGGTAATACCAG     |
| <i>IME2</i> ORF      | Fwd | +1173    | ATCCCAAGTAGACGCAAGAGGCAAT     |
|                      | Rev | +1377    | TTCTTGATTTAATGTTGGTGAGCACA    |
| <i>MET2</i> promoter | Fwd | -395     | ATTTCTTGCTATTGTTAGTGGCTCC     |
|                      | Rev | -242     | GGTGTGTGCCAAATCCAAACGATTA     |
| <i>MET2</i> ORF      | Fwd | +205     | GTAATTTGTCATGCCTTGACTIONGGGTC |
|                      | Rev | +379     | ATCTAACGCCCGTCTCCTCATTTAT     |
| <i>MET16</i> ORF     | Fwd | +324     | GGATGGATGTGAATCGGAGG          |
|                      | Rev | +443     | TTGTAGGCACGATGTGCAGG          |
| <i>MET17</i> ORF     | Fwd | +59      | ATGCTCACAGATCCAGAGCT          |
|                      | Rev | +307     | TGTCACCAGTGTGTGCCAAA          |
| <i>xMET17</i>        | Fwd | -227     | TTGCCTAGCAACTACATATGGTCACC    |
|                      | Rev | -23      | TGACCATATGTAGTTGCTAG          |
| <i>opMET17</i>       | Fwd | -129     | AAGTAAAGCGTCTGTTAGAAAGGAAGTT  |
|                      | Rev | +58      | CAACCAAAATTGGGACAACACCAG      |
| <i>TPI1</i>          | Fwd | +472     | ACTAACGTCGTTGTCGCTTACGAACC    |
|                      | Rev | +688     | AGAAACCATCGACATCAGCCTTGT      |

Table S3. Sequence of primers used in Primer extension experiments

| Gene               | Sequence 5'->3'                  |
|--------------------|----------------------------------|
| <i>GFP</i>         | AACACCAGTGAATAATTCTTC (Figure 1) |
|                    | TGACCATTAACATCACCATC (Figure 6)  |
| <i>MET17</i>       | TTGGCCGGCGTGTAGTTGAA             |
| <i>U3 (SNR17a)</i> | TCAAAGAGTGACGATTCCCTA            |

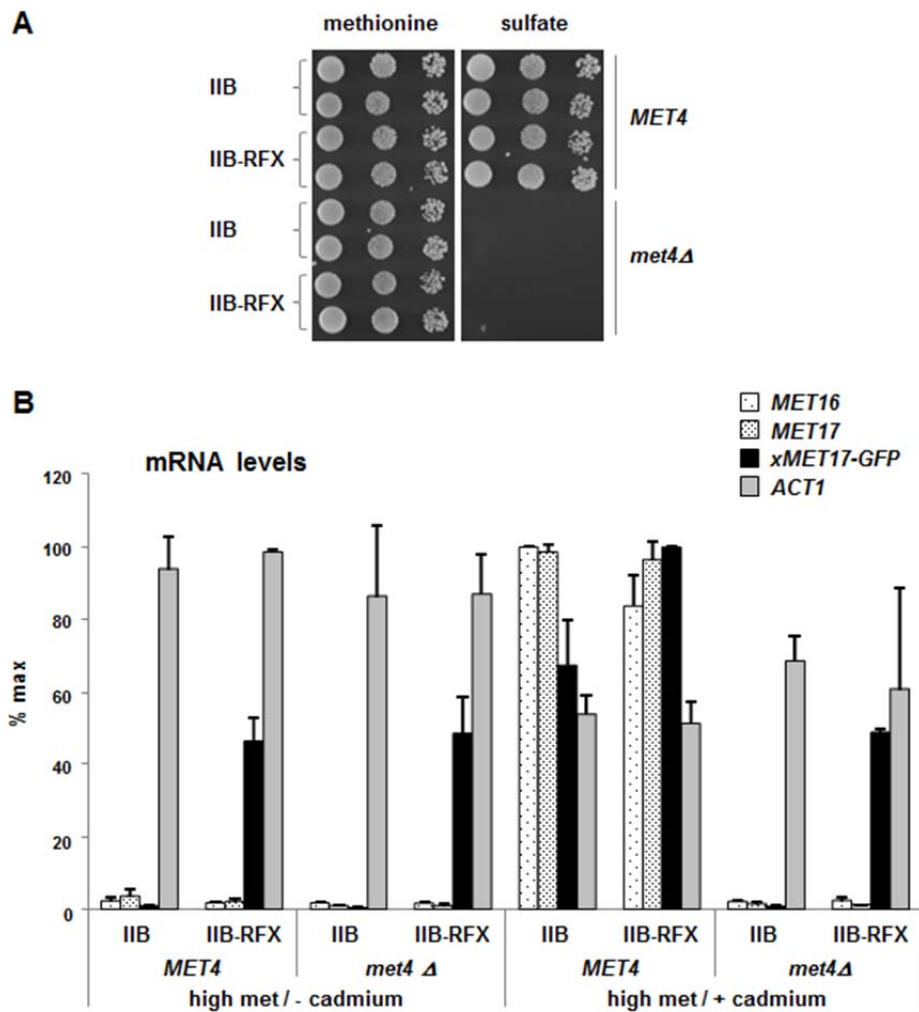

Figure S1. Effect of Met4 inactivation on transcriptional activation of *xMET17* by TFIIB-RFX. **(A)** *met4Δ* and isogenic wild-type cells (Y894 and Y963) containing YCp33-*xMET17-GFP* and either pRS313-IIB or pRS313-IIB-RFX were grown in glucose-containing CSM medium, collected, washed twice with water, and serial ten-fold dilutions were spotted on YNB medium supplemented with 0.5 mM methionine (methionine) or not (sulfate). Plates were incubated for 3 days at 28°C. **(B)** Same strains as in (A) were grown in glucose-containing CSM medium supplemented with 0.5 mM methionine in the absence (high met/- cadmium) or in the presence (high met/+ cadmium) of 0.5 mM cadmium acetate for 45 min. RNA levels were quantified by RT-qPCR as in Figure 1 using PCR primers specific for *MET16*, *MET17*, *GFP* (5'*GFP*) and *ACT1* ORF. Error bars represent standard deviations from two independent experiments.

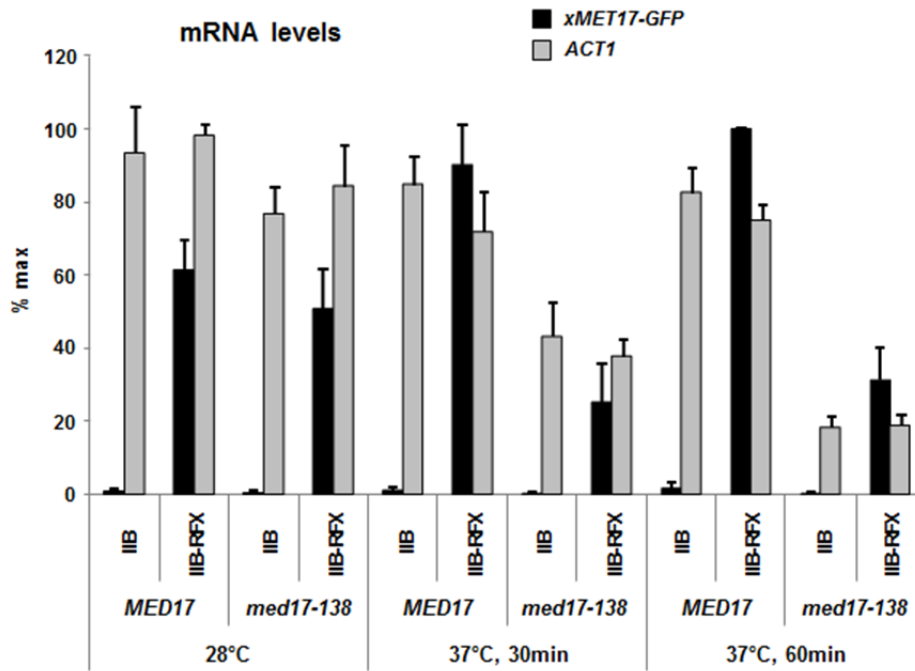

Figure S2. Med17 inactivation affects transcriptional activation by TFIIB-RFX from the *xMET17* promoter. The *med17(srb4)-138* mutant and an isogenic wild-type strain (Y822 and Y823) containing YCp33-*xMET17-GFP* and either pRS314-IIB or pRS314-IIB-RFX, were grown at 28°C in synthetic medium supplemented with 0.5 mM methionine and shifted at 37°C. RNA levels for *xMET17-GFP* and *ACT1* were quantified by RT-qPCR as in Figure 1 using PCR primers specific for the ORFs of *GFP* (5'*GFP*) and *ACT1* ORF. Error bars represent standard deviations from four independent experiments.

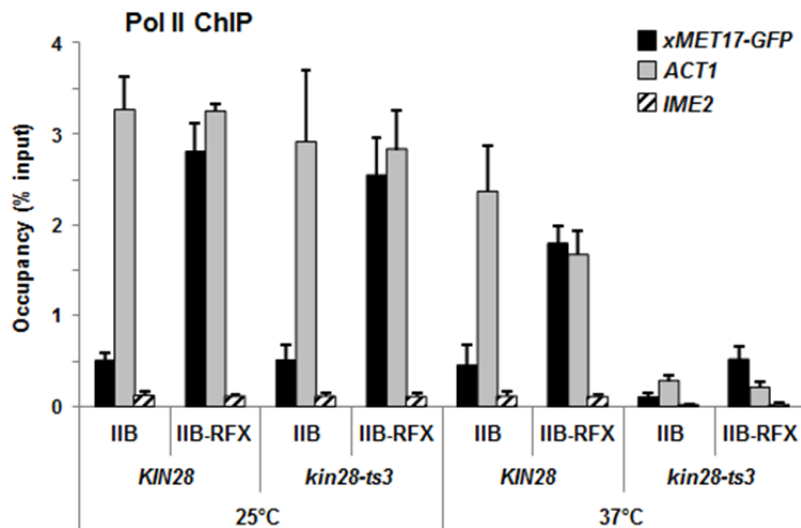

Figure S3. Effect of TFIH inactivation on transcriptional activation by TFIIB-RFX from the *xMET17* promoter. The *kin28-ts3* temperature sensitive mutant and an isogenic wild-type strain (Y959 and Y960) containing YCp33-*xMET17-GFP* and either pRS314-IIB or pRS314-IIB-RFX were grown to early log phase at 25°C in glucose-containing CSM medium supplemented with 0.5 mM methionine, and were shifted to 37°C. Pol II occupancy was measured by ChIP before and 60 min after the shift. The cultures at 37°C were brought to 25°C before crosslinking by mixing with an equivalent volume of pre-cooled medium. DNA was analyzed by qPCR using primers specific for the ORFs of *GFP* (5' ORF), *ACT1* and *IME2*. Error bars indicate standard deviations from three independent experiments.

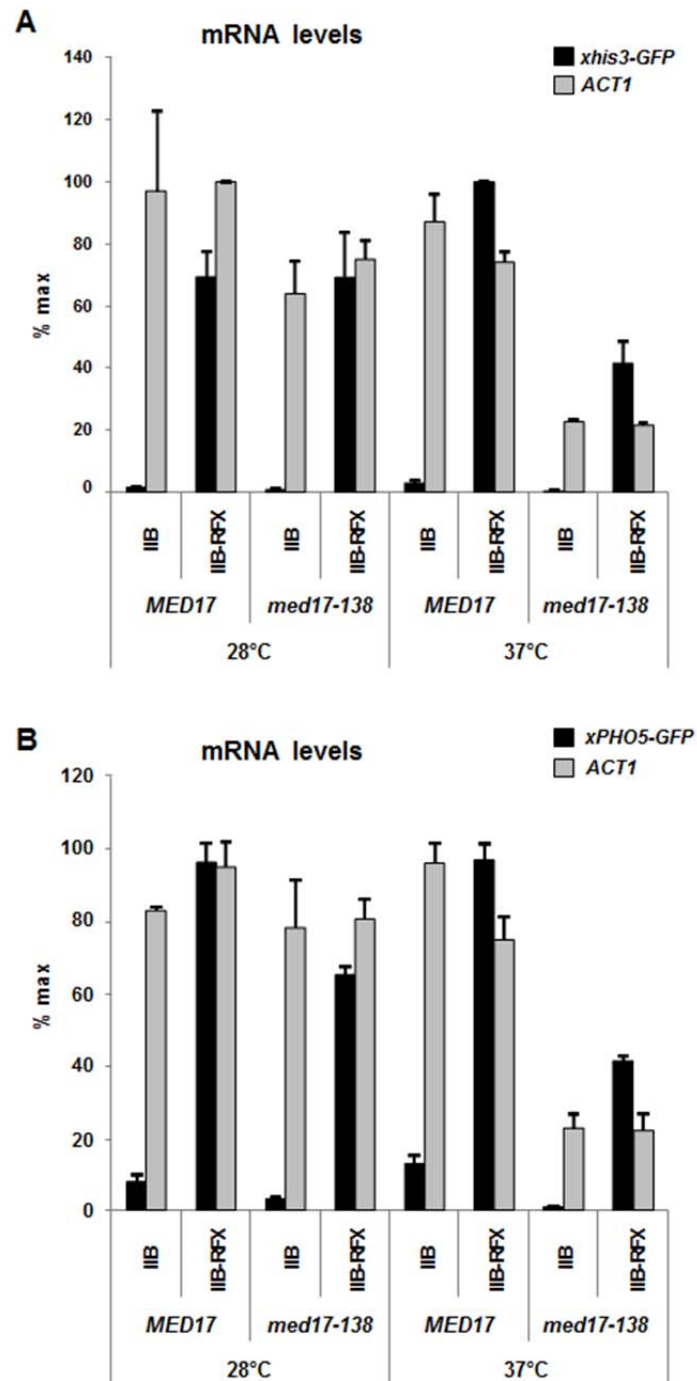

Figure S4. Med17 inactivation affects transcriptional activation by TFIIIB-RFX from the *xhis3* and *xPHO5* promoters. The *med17(srb4)-138* mutant and an isogenic wild-type strain (Y822 and Y823) containing YCp33-*xhis3-GFP* (A) or YCp33-*xPHO5-GFP* (B) and either pRS314-IIB or pRS314-IIB-RFX, were grown at 28°C in synthetic medium supplemented with 0.5 mM methionine and shifted at 37°C for 60 min. RNA levels for *xPHO5-GFP* and *ACT1* were quantified by RT-qPCR as in Figure 1 using PCR primers specific for the ORFs of *GFP* (5'*GFP*) and *ACT1* ORF. Error bars represent standard deviations from two independent experiments.
